# Supplementary material for: Critical role for CaFEN1 and CaFEN12 of Candida albicans in cell wall integrity and biofilm formation
Source: PubMed Central journal article supplement (PMC5227966; doi:10.1038/srep40281), 2017-01-12
Supplement: srep40281-s1.pdf [file srep40281-s1.pdf]

Supplementary Figures

**Critical role for *CaFEN1* and *CaFEN12* of *Candida albicans* in cell wall integrity and biofilm Formation**

Md. Alfatah, Vinay K. Bari, Anubhav S. Nahar, Swati Bijlani and K. Ganesan

*CSIR-Institute of Microbial Technology, Sector 39-A, Chandigarh-160 036, India*

Contents:

Figure S1

Figure S2

Figure S3

Figure S4

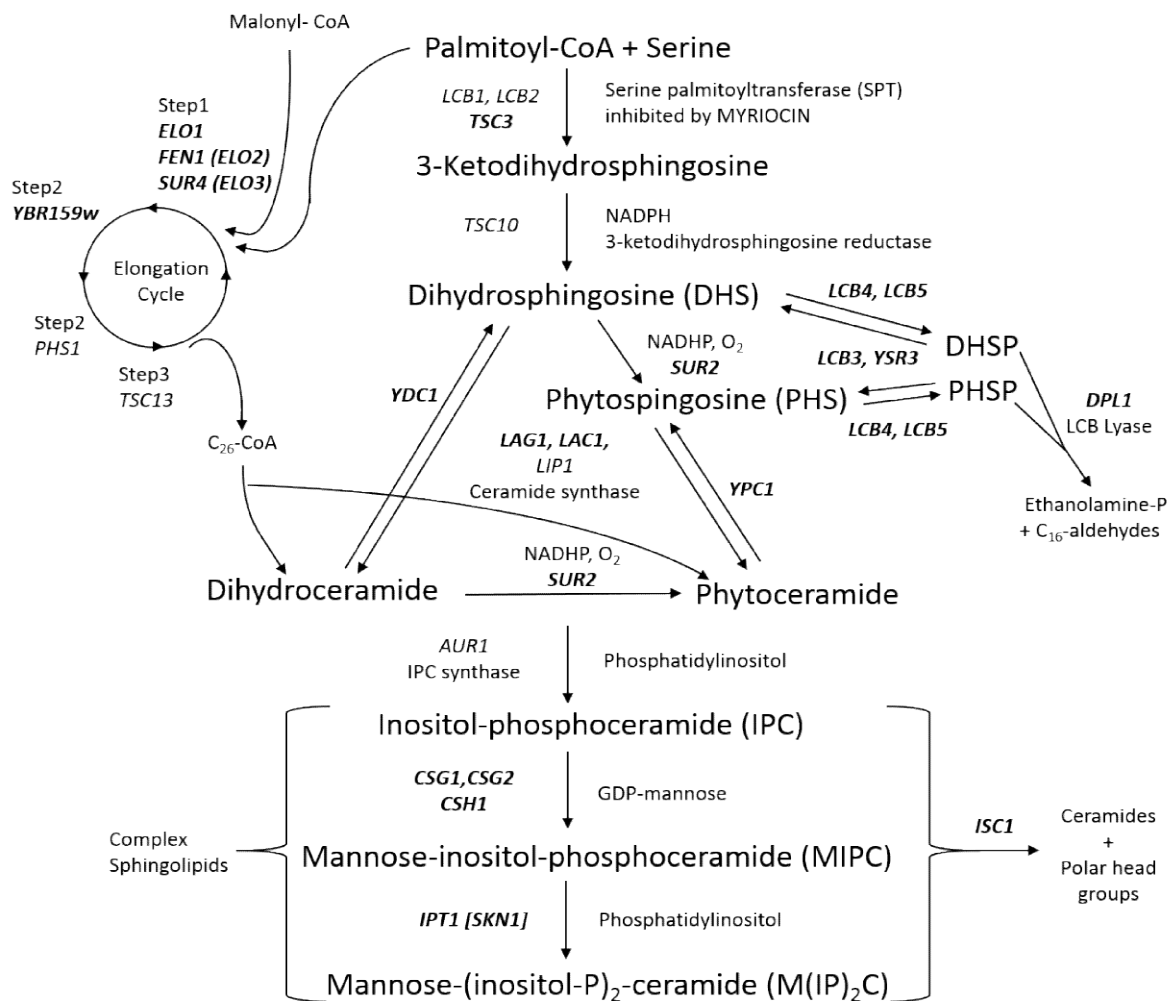

**Figure S1. Overview of sphingolipid biosynthetic pathway of yeast.** Genes that can be deleted without loss of cell viability are shown in bold font. Adapted from: Dickson, *Journal of lipid research* 49, 909-921 (2008), and Rego et al. *FEMS Yeast Res* 14, 160-78 (2014).

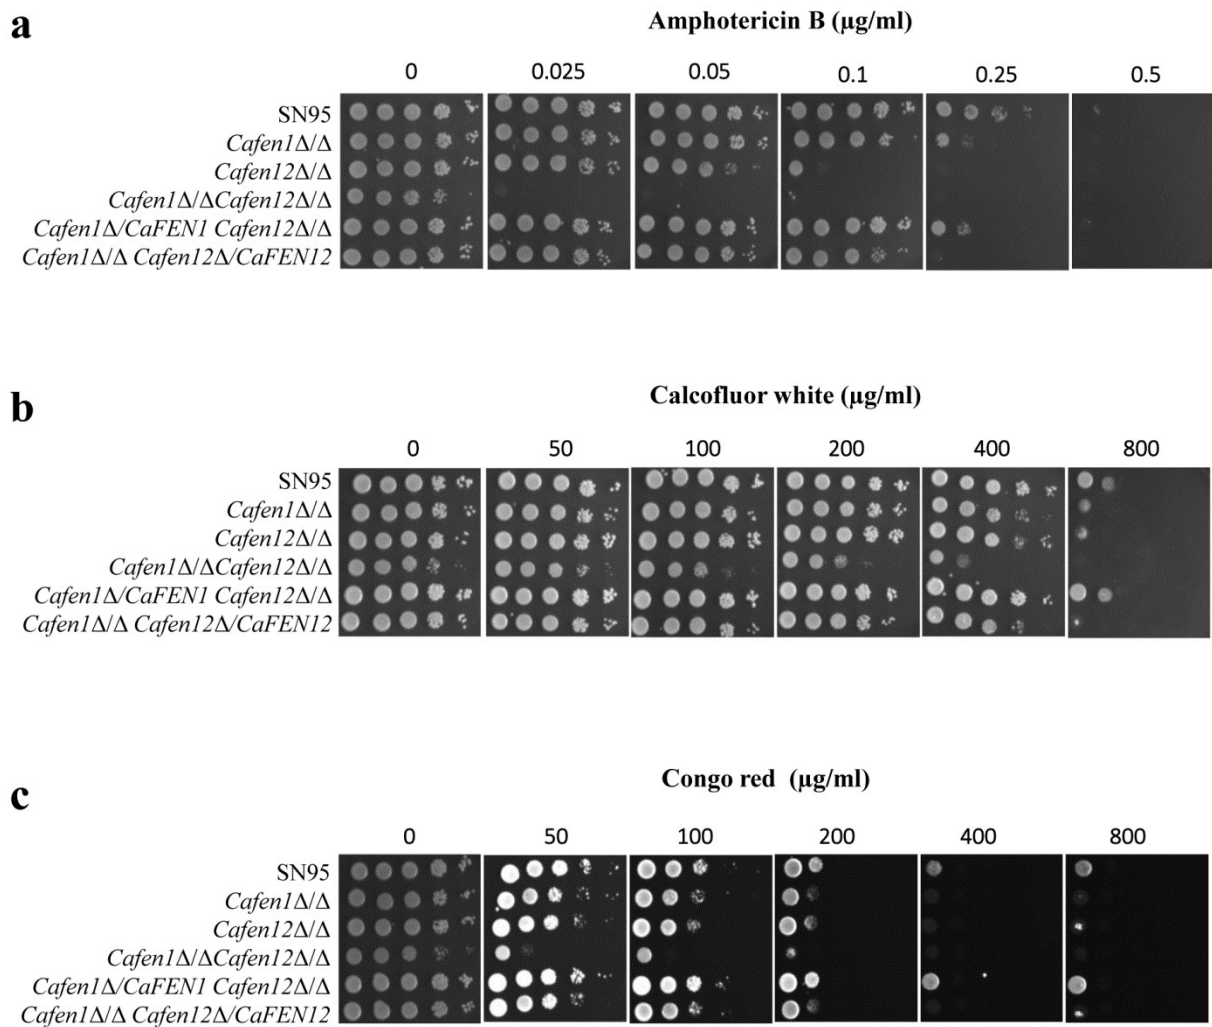

**Figure S2.** Sensitivity of double delete strain (*Cafen1* $\Delta/\Delta$ *Cafen12* $\Delta/\Delta$ ) of *C. albicans* to amphotericin B (Panel **a**), calcofluor white (Panel **b**) and congo red (Panel **c**) is suppressed in the strains with reintegrated wild type copies of *CaFEN1* (*Cafen1* $\Delta/\Delta$ *CaFEN1* *Cafen12* $\Delta/\Delta$ ) or *CaFEN12* (*Cafen1* $\Delta/\Delta$  *Cafen12* $\Delta/\Delta$ *CaFEN12*).

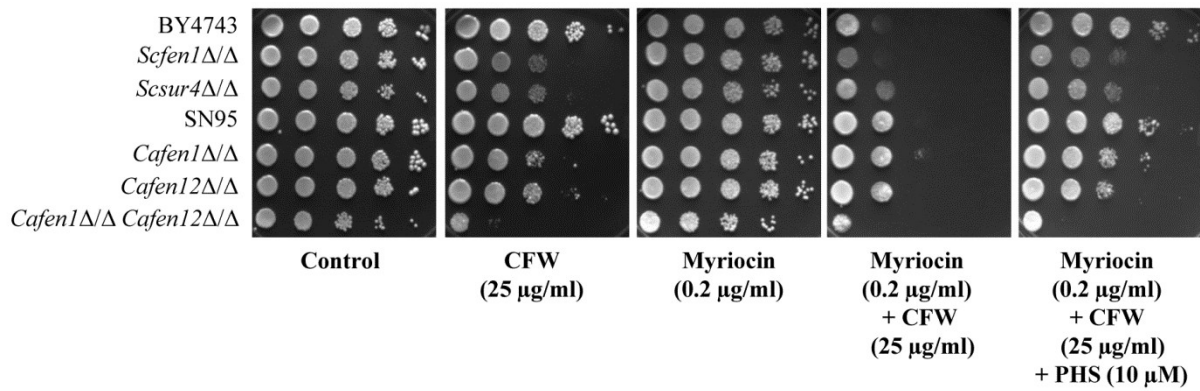

**Figure S3. Spingolipid depletion by myriocin sensitises cells calcofluor white.**

*S. cerevisiae* strains deleted in *FEN1* or *SUR4* and *C. albicans* strains deleted in *FEN1* or *FEN12* or both were tested for their sensitivity to CFW alone or in the presence of myriocin or myriocin and phytosphingosine (PHS). The CFW sensitivity, enhanced by sublethal concentration of myriocin, is suppressed by PHS.

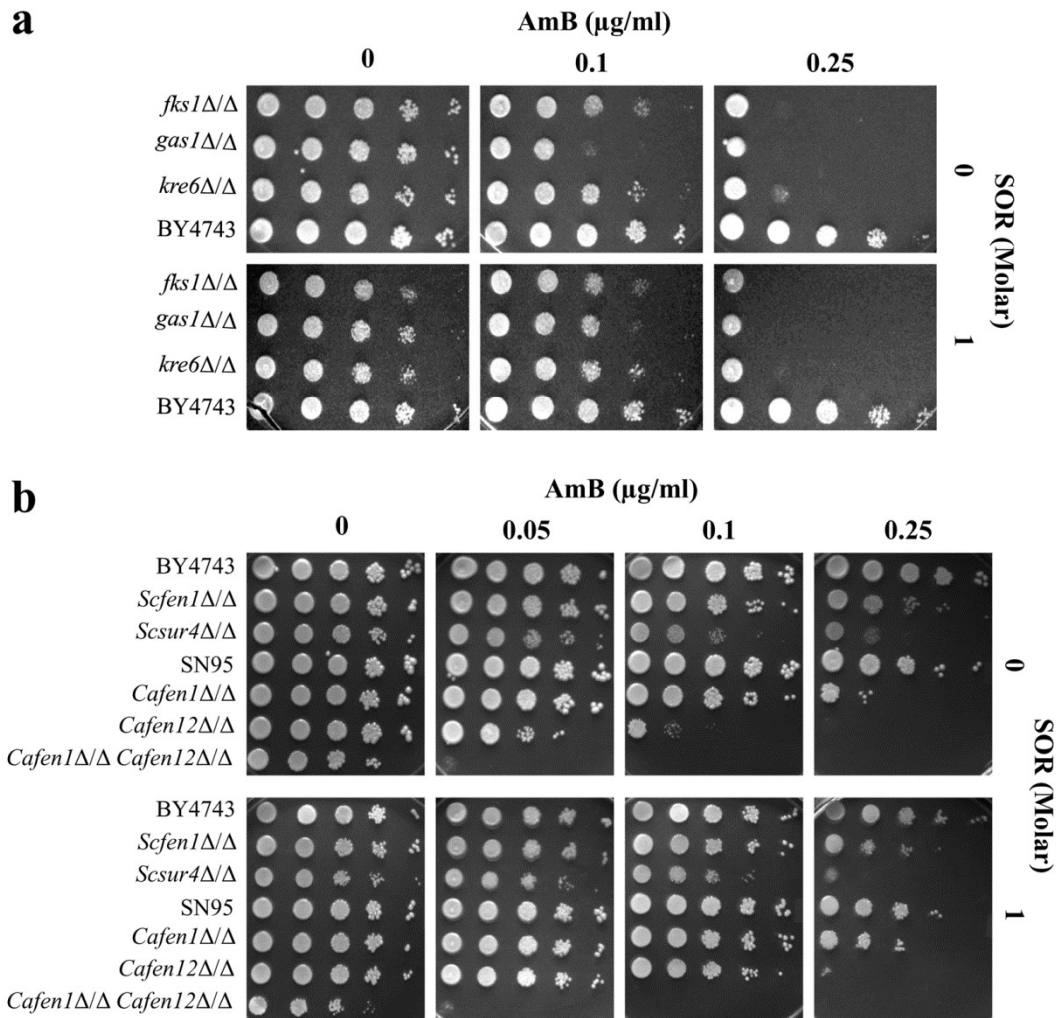

**Figure S4. Effect of osmotic stabiliser on amphotericin B sensitivity.** (a) AmB sensitivity of *S. cerevisiae* strains deleted in *FKS1*, *GAS1* or *KRE6* genes is not suppressed by sorbitol. AmB susceptibility of the parent (BY4743), *kre6* $\Delta/\Delta$ , *gas1* $\Delta/\Delta$  and *fks1* $\Delta/\Delta$  strains were tested alone (upper panels) or in the presence of 1 M sorbitol (lower panels). (b) AmB sensitivity for *C. albicans* single strains deleted in *CaFEN1* or *CaFEN12* is partially reversed by sorbitol. Parent and delete strains of *S. cerevisiae* and *C. albicans* were tested for their sensitivity to AmB alone (upper panels) or in the presence of 1 M sorbitol (lower panels).
